# Supplementary material for: Sex as a Moderator Between Parent Ratings of Executive Dysfunction and Social Difficulties in Children and Adolescents with Autism Spectrum Disorder
Source: Springer Nature journal article supplement (doi:10.1007/s10803-022-05629-5), 2022-07-15
Supplement: MOESM1 [file 23274342]

## Supplementary Information

### Sex as a moderator between parent ratings of executive dysfunction and social difficulties in children and adolescents with autism spectrum disorder

Tonje Torske <sup>a,b\*</sup>, Terje Nærland <sup>c,d</sup>, Daniel S. Quintana <sup>b,c,d,e</sup>, Ruth Elizabeth Hypher <sup>f,m</sup>, Anett Kaale <sup>c,g</sup>, Anne Lise Høyland <sup>h,i</sup>, Sigrun Hope <sup>e,j</sup>, Jarle Johannessen <sup>c,k</sup>, Merete G Øie <sup>b,l</sup> and Ole A Andreassen <sup>d,e</sup>

<sup>a</sup> Division of Mental Health and Addiction, Vestre Viken Hospital Trust, Drammen, Norway

<sup>b</sup> Department of Psychology, University of Oslo, Norway

<sup>c</sup> NevSom Department of Rare Disorders and Disabilities, Oslo University Hospital, Oslo, Norway

<sup>d</sup> K.G. Jebsen Center for Neurodevelopmental Disorders, University of Oslo, Norway

<sup>e</sup> NORMENT, University of Oslo and Oslo University Hospital, Oslo, Norway

<sup>f</sup> Division of Mental Health and Addiction, Oslo University Hospital, Oslo, Norway

<sup>g</sup> Department of Special Needs Education, University of Oslo, Norway

<sup>h</sup> Regional Centre for Child and Youth Mental Health and Child Welfare, Department of Mental Health, Faculty of Medicine and Health Sciences, Norwegian University of Science and Technology, Trondheim, Norway

<sup>i</sup> Department of Pediatrics, St. Olav Hospital, Trondheim University Hospital, Trondheim, Norway

<sup>j</sup> Department of Neurohabilitation, Oslo University Hospital, Oslo, Norway

<sup>k</sup> Department of Medicine, University of Oslo, Norway

<sup>l</sup> Research Department, Innlandet Hospital Trust, Lillehammer, Norway

<sup>m</sup> Department of Clinical Neurosciences for Children, Division of Pediatric and Adolescent Medicine, Oslo University Hospital, Norway

*\*Corresponding author*

E-mail: [tonje.torske@vestreviken.no](mailto:tonje.torske@vestreviken.no) (TT)

Supplementary Table S1. Age, IQ, BRIEF and ADI-R scores for girls and boys with ASD matched sample (N = 66) <sup>a</sup>

| Scale                                                                  | Girls       |    | Boys        |    | df   | <i>p-value</i> | Glass' delta |
|------------------------------------------------------------------------|-------------|----|-------------|----|------|----------------|--------------|
|                                                                        | M (SD)      | n  | M (SD)      | n  |      |                |              |
| Age                                                                    | 11.9 (3.1)  | 22 | 11.2 (3.3)  | 44 | 44.6 | 0.415          | -0.21        |
| Full-scale IQ                                                          | 93.5 (9.3)  | 22 | 92.1 (11.3) | 44 | 50.1 | 0.604          | -0.12        |
| BRIEF<br>Global Executive Composite<br>(GEC)                           | 69.5 (10.5) | 22 | 67.0 (11.3) | 44 | 45.0 | 0.376          | -0.22        |
| BRIEF<br>Behavioral Regulation Index<br>(BRI)                          | 68.3 (15.2) | 22 | 67.8 (11.7) | 42 | 34.6 | 0.891          | -0.04        |
| BRIEF Metacognition Index<br>(MI)                                      | 68.4 (8.7)  | 22 | 64.2 (11.2) | 44 | 52.6 | 0.102          | -0.38        |
| ADI-R (A)<br>Reciprocal Social Interaction<br>domain                   | 11.7 (6.5)  | 22 | 12.1 (5.1)  | 44 | 34.4 | 0.842          | 0.08         |
| ADI-R (B)<br>Communication domain                                      | 8.9 (5.6)   | 21 | 9.3 (4.5)   | 43 | 33.2 | 0.803          | 0.09         |
| ADI-R (C)<br>Restricted, repetitive and<br>stereotyped behavior domain | 2.5 (2.1)   | 21 | 3.9 (2.4)   | 43 | 44.8 | 0.021          | 0.58         |

\*  $p = 0.008$

Welch's t-tests were conducted for age, IQ, BRIEF and ADI-R comparisons between sexes.

IQ = Intelligence Quotient

BRIEF: Behavior Rating Inventory of Executive Functions

ADI-R: Autism Diagnostic Interview-Revised diagnostic algorithm

Note. BRIEF scores are reported as T scores (M = 50, SD = 10) and ADI-R scores are reported as domain scores from the diagnostic algorithm.

<sup>a</sup> The participants were recruited from Norwegian health services specializing in the assessment of ASD and other neurodevelopmental disorders. The study was part of the national BUPGEN network. The matched sample consisted of 22 girls and 44 boys with ASD who were recruited between 2013 and May 2018 and assessed at age 5-19 years. Nine of the children (2 girls, 7 boys) were diagnosed with childhood autism, 5 (2 girls, 3 boys) with atypical autism, 27 (11 girls, 16 boys) with Asperger syndrome and 25 (7 girls, 18 boys) with unspecified pervasive developmental disorder (PDD-NOS). The male:female ratio was 2:1. In total, 17 children (25.8%) had a comorbid disorder of attention deficit/hyperactivity disorder (ADHD). Participants had an intelligence quotient (IQ) within the normal range based on a standardized Wechsler's test (Full-scale IQ  $\geq 70$ ) and spoke Norwegian fluently. Exclusion criteria were significant sensory losses (vision and/or hearing).

Supplementary Table S2. Nested hierarchical model summary: Reciprocal Social Interaction domain matched sample (N = 66)

| ADI-R A         | $R^2$ | $B$    | $SE B$ | $p$     |
|-----------------|-------|--------|--------|---------|
| Model 1         | 0.03  |        |        | 0.740   |
| Constant        |       | 20.95  | 6.80   | 0.003*  |
| Sex             |       | -0.28  | 1.50   | 0.850   |
| IQ              |       | -0.08  | 0.07   | 0.219   |
| ADHD diagnosis  |       | -1.06  | 1.62   | 0.516   |
| Age             |       | -0.06  | 0.22   | 0.783   |
| Model 2         | 0.15  |        |        | 0.070   |
| Constant        |       | 8.89   | 7.62   | 0.248   |
| Sex             |       | -0.79  | 1.42   | 0.580   |
| IQ              |       | -0.07  | 0.06   | 0.275   |
| ADHD diagnosis  |       | -1.65  | 1.54   | 0.288   |
| Age             |       | -0.10  | 0.21   | 0.614   |
| BRIEF GEC       |       | 0.18   | 0.06   | 0.005*  |
| Model 3         | 0.29  |        |        | 0.002*  |
| Constant        |       | 46.82  | 13.16  | <0.001* |
| Sex             |       | -30.27 | 8.75   | 0.001*  |
| IQ              |       | -0.07  | 0.06   | 0.203   |
| ADHD diagnosis  |       | -0.43  | 1.46   | 0.768   |
| Age             |       | -0.03  | 0.19   | 0.878   |
| BRIEF GEC       |       | -0.39  | 0.18   | 0.031   |
| BRIEF GEC * Sex |       | 0.43   | 0.13   | 0.001*  |

\*  $p = 0.017$

ADI-R: Autism Diagnostic Interview- Revised, diagnostic algorithm. A: Reciprocal Social Interaction domain, B: Communication domain, C: Restricted, repetitive and stereotyped behavior domain.

ADHD: Attention deficit/ hyperactivity disorder

IQ: Intelligence Quotient

BRIEF\_GEC: Behavior Rating Inventory of Executive Function, Global Executive Composite

B = unstandardized regression coefficients

Supplementary Table S3. Nested hierarchical model summary: Communication domain matched sample (N = 66)

| ADI-R B         | $R^2$ | $B$    | $SE B$ | $p$    |
|-----------------|-------|--------|--------|--------|
| Model 1         | 0.04  |        |        | 0.604  |
| Constant        |       | 16.87  | 5.89   | 0.006* |
| Sex             |       | -0.10  | 1.31   | 0.938  |
| IQ              |       | -0.08  | 0.06   | 0.180  |
| ADHD diagnosis  |       | 0.95   | 1.43   | 0.511  |
| Age             |       | -0.05  | 0.19   | 0.802  |
| Model 2         | 0.14  |        |        | 0.122  |
| Constant        |       | 7.85   | 6.72   | 0.248  |
| Sex             |       | -0.56  | 1.27   | 0.662  |
| IQ              |       | -0.07  | 0.06   | 0.239  |
| ADHD diagnosis  |       | 0.56   | 1.38   | 0.685  |
| Age             |       | -0.09  | 0.19   | 0.614  |
| BRIEF GEC       |       | 0.13   | 0.05   | 0.016* |
| Model 3         | 0.27  |        |        | 0.004* |
| Constant        |       | 40.29  | 11.68  | 0.001* |
| Sex             |       | -26.08 | 7.86   | 0.002* |
| IQ              |       | -0.07  | 0.05   | 0.195  |
| ADHD diagnosis  |       | 1.66   | 1.32   | 0.212  |
| Age             |       | -0.05  | 0.17   | 0.764  |
| BRIEF GEC       |       | -0.35  | 0.16   | 0.029  |
| BRIEF GEC * Sex |       | 0.37   | 0.11   | 0.002* |

\*  $p = 0.017$

ADI-R: Autism Diagnostic Interview- Revised, diagnostic algorithm. A: Reciprocal Social Interaction domain, B: Communication domain, C: Restricted, repetitive and stereotyped behavior domain.

ADHD: Attention deficit/ hyperactivity disorder

IQ: Intelligence Quotient

BRIEF\_GEC: Behavior Rating Inventory of Executive Function, Global Executive Composite

B = unstandardized regression coefficients

Supplementary Table S4. Nested hierarchical model summary: Restricted, repetitive and stereotyped behavior domain matched sample (N = 66)

| ADI-R C         | $R^2$ | $B$   | $SE B$ | $p$    |
|-----------------|-------|-------|--------|--------|
| Model 1         | 0.08  |       |        | 0.285  |
| Constant        |       | 6.40  | 2.86   | 0.029  |
| Sex             |       | -1.38 | 0.64   | 0.034  |
| IQ              |       | -0.01 | 0.03   | 0.690  |
| ADHD diagnosis  |       | 0.02  | 0.69   | 0.972  |
| Age             |       | 0.00  | 0.09   | 0.958  |
| Model 2         | 0.16  |       |        | 0.067  |
| Constant        |       | 2.26  | 3.29   | 0.494  |
| Sex             |       | -1.59 | 0.62   | 0.013* |
| IQ              |       | -0.01 | 0.03   | 0.835  |
| ADHD diagnosis  |       | -0.15 | 0.67   | 0.823  |
| Age             |       | -0.03 | 0.09   | 0.776  |
| BRIEF GEC       |       | 0.06  | 0.03   | 0.023  |
| Model 3         | 0.19  |       |        | 0.048  |
| Constant        |       | 10.33 | 6.10   | 0.096  |
| Sex             |       | -7.94 | 4.10   | 0.058  |
| IQ              |       | -0.01 | 0.03   | 0.824  |
| ADHD diagnosis  |       | 0.12  | 0.69   | 0.859  |
| Age             |       | -0.02 | 0.09   | 0.864  |
| BRIEF GEC       |       | -0.06 | 0.08   | 0.472  |
| BRIEF GEC * Sex |       | 0.09  | 0.06   | 0.123  |

\*  $p = 0.017$

ADI-R: Autism Diagnostic Interview- Revised, diagnostic algorithm. A: Reciprocal Social Interaction domain, B: Communication domain, C: Restricted, repetitive and stereotyped behavior domain.

ADHD: Attention deficit/ hyperactivity disorder

IQ: Intelligence Quotient

BRIEF\_GEC: Behavior Rating Inventory of Executive Function, Global Executive Composite

B = unstandardized regression coefficients

Supplementary Table S5. Bootstrapped model ADI-R A

| Model 1    |              |         |                    |         |
|------------|--------------|---------|--------------------|---------|
| Predictors | Direct model |         | Bootstrapped model |         |
|            | 2.50 %       | 97.50 % | 2.50 %             | 97.50 % |
| Intercept  | 9.65         | 30.30   | 10.88              | 29.43   |
| Sex        | -2.75        | 2.49    | -3.27              | 2.81    |
| IQ         | -0.16        | 0.02    | -0.15              | 0.00    |
| ADHD       | -3.56        | 1.04    | -3.59              | 1.14    |
| Age        | -0.42        | 0.25    | -0.40              | 0.19    |

  

| Model 2    |              |         |                    |         |
|------------|--------------|---------|--------------------|---------|
| Predictors | Direct model |         | Bootstrapped model |         |
|            | 2.50 %       | 97.50 % | 2.50 %             | 97.50 % |
| Intercept  | -1.14        | 22.49   | -0.59              | 20.59   |
| Sex        | -3.09        | 1.99    | -3.21              | 2.25    |
| IQ         | -0.15        | 0.01    | -0.13              | 0.01    |
| ADHD       | -4.13        | 0.38    | -4.30              | 0.60    |
| Age        | -0.40        | 0.25    | -0.39              | 0.23    |
| BRIEF GEC  | 0.04         | 0.24    | 0.05               | 0.25    |

  

| Model 3         |              |         |                    |         |
|-----------------|--------------|---------|--------------------|---------|
| Predictors      | Direct model |         | Bootstrapped model |         |
|                 | 2.50 %       | 97.50 % | 2.50 %             | 97.50 % |
| Intercept       | 22.99        | 66.39   | 26.46              | 62.74   |
| Sex             | -45.07       | -13.34  | -42.59             | -14.55  |
| IQ              | -0.15        | 0.01    | -0.14              | 0.00    |
| ADHD            | -3.21        | 1.14    | -3.40              | 1.25    |
| Age             | -0.36        | 0.25    | -0.34              | 0.25    |
| BRIEF GEC       | -0.66        | -0.07   | -0.63              | -0.11   |
| BRIEF GEC * Sex | 0.19         | 0.65    | 0.21               | 0.61    |

ADI-R: Autism Diagnostic Interview- Revised, diagnostic algorithm. A: Reciprocal Social Interaction domain, B: Communication domain, C: Restricted, repetitive and stereotyped behavior domain

IQ: Intelligence Quotient

ADHD: Attention deficit/ hyperactivity disorder

BRIEF\_GEC: Behavior Rating Inventory of Executive Function, Global Executive Composite

The standardized residuals from models 1 ( $p = 0.02$ ), 2 ( $p = 0.01$ ), and 3 ( $p = 0.003$ ) were not normally distributed. Confidence intervals for the intercept and slopes of this model were similar to a bootstrapped model (Supplementary Table S5), indicating that there were no considerable problems with non-normal distribution of residuals in the model.

Supplementary Table S6. Bootstrapped model ADI-R B

| Model 1    |              |         |                    |         |
|------------|--------------|---------|--------------------|---------|
| Predictors | Direct model |         | Bootstrapped model |         |
|            | 2.50 %       | 97.50 % | 2.50 %             | 97.50 % |
| Intercept  | 3.98         | 21.74   | 4.34               | 21.20   |
| Sex        | -2.68        | 1.85    | -2.82              | 2.31    |
| IQ         | -0.11        | 0.04    | -0.10              | 0.04    |
| ADHD       | -1.57        | 2.45    | -1.64              | 2.53    |
| Age        | -0.28        | 0.30    | -0.23              | 0.27    |

  

| Model 2    |              |         |                    |         |
|------------|--------------|---------|--------------------|---------|
| Predictors | Direct model |         | Bootstrapped model |         |
|            | 2.50 %       | 97.50 % | 2.50 %             | 97.50 % |
| Intercept  | -4.14        | 16.35   | -3.40              | 14.52   |
| Sex        | -2.99        | 1.47    | -2.98              | 1.70    |
| IQ         | -0.11        | 0.04    | -0.10              | 0.03    |
| ADHD       | -2.01        | 1.98    | -2.16              | 2.17    |
| Age        | -0.27        | 0.29    | -0.28              | 0.28    |
| BRIEF GEC  | 0.02         | 0.19    | 0.02               | 0.19    |

  

| Model 3         |              |         |                    |         |
|-----------------|--------------|---------|--------------------|---------|
| Predictors      | Direct model |         | Bootstrapped model |         |
|                 | 2.50 %       | 97.50 % | 2.50 %             | 97.50 % |
| Intercept       | 16.08        | 54.31   | 19.23              | 52.03   |
| Sex             | -39.47       | -11.26  | -38.80             | -12.33  |
| IQ              | -0.10        | 0.04    | -0.09              | 0.03    |
| ADHD            | -1.18        | 2.68    | -1.27              | 2.76    |
| Age             | -0.25        | 0.28    | -0.24              | 0.25    |
| BRIEF GEC       | -0.59        | -0.07   | -0.59              | -0.09   |
| BRIEF GEC * Sex | 0.15         | 0.56    | 0.17               | 0.55    |

ADI-R: Autism Diagnostic Interview- Revised, diagnostic algorithm. A: Reciprocal Social Interaction domain, B: Communication domain, C: Restricted, repetitive and stereotyped behavior domain  
 IQ: Intelligence Quotient  
 ADHD: Attention deficit/ hyperactivity disorder  
 BRIEF\_GEC: Behavior Rating Inventory of Executive Function, Global Executive Composite

The standardized residuals from models 1 ( $p = 0.004$ ), 2 ( $p = 0.02$ ), and 3 ( $p = 0.01$ ) were not normally distributed. Confidence intervals for the intercept and slopes of this model were similar to a bootstrapped model (Supplementary Table S6), indicating that there were no considerable problems with non-normal distribution of residuals in the model.

Supplementary Table S7. Bootstrapped model ADI-R C

| Model 1    |              |         |                    |         |
|------------|--------------|---------|--------------------|---------|
| Predictors | Direct model |         | Bootstrapped model |         |
|            | 2.50 %       | 97.50 % | 2.50 %             | 97.50 % |
| Intercept  | 1.41         | 9.98    | 1.78               | 9.67    |
| Sex        | -2.09        | 0.10    | -2.05              | 0.10    |
| IQ         | -0.05        | 0.02    | -0.05              | 0.02    |
| ADHD       | -1.35        | 0.57    | -1.25              | 0.68    |
| Age        | -0.13        | 0.15    | -0.11              | 0.13    |

  

| Model 2    |              |         |                    |         |
|------------|--------------|---------|--------------------|---------|
| Predictors | Direct model |         | Bootstrapped model |         |
|            | 2.50 %       | 97.50 % | 2.50 %             | 97.50 % |
| Intercept  | -2.28        | 7.65    | -2.03              | 7.51    |
| Sex        | -2.23        | -0.07   | -2.14              | -0.10   |
| IQ         | -0.05        | 0.02    | -0.05              | 0.02    |
| ADHD       | -1.54        | 0.37    | -1.47              | 0.49    |
| Age        | -0.13        | 0.15    | -0.10              | 0.13    |
| BRIEF GEC  | 0.01         | 0.09    | 0.00               | 0.09    |

  

| Model 3         |              |         |                    |         |
|-----------------|--------------|---------|--------------------|---------|
| Predictors      | Direct model |         | Bootstrapped model |         |
|                 | 2.50 %       | 97.50 % | 2.50 %             | 97.50 % |
| Intercept       | 0.64         | 20.01   | 1.92               | 19.60   |
| Sex             | -14.77       | -0.47   | -14.28             | -1.56   |
| IQ              | -0.05        | 0.02    | -0.05              | 0.03    |
| ADHD            | -1.35        | 0.58    | -1.30              | 0.64    |
| Age             | -0.12        | 0.15    | -0.09              | 0.14    |
| BRIEF GEC       | -0.20        | 0.06    | -0.19              | 0.05    |
| BRIEF GEC * Sex | -0.01        | 0.20    | 0.00               | 0.19    |

ADI-R: Autism Diagnostic Interview- Revised, diagnostic algorithm. A: Reciprocal Social Interaction domain, B: Communication domain, C: Restricted, repetitive and stereotyped behavior domain

IQ: Intelligence Quotient

ADHD: Attention deficit/ hyperactivity disorder

BRIEF\_GEC: Behavior Rating Inventory of Executive Function, Global Executive Composite

The standardized residuals from models 2 and 3, which included the predictor of EF were normally distributed ( $p > 0.05$ ), however, they were not normally distributed for the first model ( $p = 0.01$ ). Confidence intervals for the intercept and slopes of this model were similar to a bootstrapped model (Supplementary Table S7), indicating that there were no considerable problems with non-normal distribution of residuals in the model.



Supplementary Table S8. Age, IQ, BRIEF and ADI-R scores for girls and boys with ASD age 11 and younger (pre-puberty) (N=70)

| Scale                                                               | Girls       |    | Boys        |    | df   | <i>p-value</i> | Glass' delta |
|---------------------------------------------------------------------|-------------|----|-------------|----|------|----------------|--------------|
|                                                                     | Mean (SD)   | n  | Mean (SD)   | n  |      |                |              |
| Age                                                                 | 9.3 (1.7)   | 11 | 8.5 (2.0)   | 59 | 16.1 | 0.219          | -0.44        |
| Full-scale IQ                                                       | 94.6 (8.8)  | 10 | 97.9 (12.4) | 49 | 17.2 | 0.334          | 0.37         |
| BRIEF<br>Global Executive Composite (GEC)                           | 70.4 (9.3)  | 11 | 66.5 (11.2) | 59 | 23.2 | 0.240          | -0.42        |
| BRIEF<br>Behavioral Regulation Index (BRI)                          | 68.5 (16.4) | 11 | 67.5 (11.6) | 54 | 12.1 | 0.841          | -0.06        |
| BRIEF Metacognition Index (MI)                                      | 69.4 (6.5)  | 11 | 63.8 (11.8) | 59 | 24.2 | 0.035          | -0.86        |
| ADI-R (A)<br>Reciprocal Social Interaction domain                   | 13.5 (5.5)  | 11 | 11.7 (4.9)  | 59 | 13.2 | 0.347          | -0.32        |
| ADI-R (B)<br>Communication domain                                   | 8.6 (4.5)   | 11 | 9.4 (4.5)   | 57 | 14.1 | 0.619          | 0.17         |
| ADI-R (C)<br>Restricted, repetitive and stereotyped behavior domain | 2.4 (2.5)   | 11 | 3.3 (2.1)   | 58 | 12.9 | 0.244          | 0.39         |

\*  $p = 0.008$

Welch's t-tests were conducted for age, IQ, BRIEF and ADI-R comparisons between sexes

IQ = Intelligence Quotient

BRIEF: Behavior Rating Inventory of Executive Functions

ADI-R: Autism Diagnostic Interview-Revised

Note. BRIEF scores are reported as T scores (M = 50, SD = 10) and ADI-R scores are reported as domain scores from the diagnostic algorithm.

Supplementary Table S9. Age, IQ, BRIEF and ADI-R scores for girls and boys with ASD age 12 and older (post-puberty) (N=46)

| Scale                                                                  | Girls<br>Mean (SD) | n  | Boys<br>Mean (SD) | n  | df    | <i>p-value</i> | Glass' delta |
|------------------------------------------------------------------------|--------------------|----|-------------------|----|-------|----------------|--------------|
| Age                                                                    | 14.1 (2.1)         | 14 | 13.8 (1.8)        | 32 | 21.4  | 0.613          | -0.16        |
| Full-scale IQ                                                          | 92.5 (10.0)        | 12 | 92.0 (13.6)       | 31 | 27.5  | 0.902          | -0.05        |
| BRIEF<br>Global Executive Composite<br>(GEC)                           | 68.6 (11.1)        | 14 | 68.5 (10.2)       | 32 | 23.2  | 0.960          | -0.02        |
| BRIEF<br>Behavioral Regulation Index<br>(BRI)                          | 66.9 (13.7)        | 14 | 68.8 (12.4)       | 32 | 22.8  | 0.662          | 0.14         |
| BRIEF Metacognition Index<br>(MI)                                      | 68.1 (9.6)         | 14 | 65.8 (9.4)        | 32 | 24.3  | 0.473          | -0.23        |
| ADI-R (A)<br>Reciprocal Social Interaction<br>domain                   | 10.6 (6.5)         | 14 | 11.8 (5.4)        | 32 | 21.1  | 0.551          | 0.18         |
| ADI-R (B)<br>Communication domain                                      | 8.9 (5.9)          | 13 | 8.9 (4.1)         | 30 | 17.3  | 0.989          | -0.00        |
| ADI-R (C)<br>Restricted, repetitive and<br>stereotyped behavior domain | 2.4 (1.7)          | 13 | 3.5 (2.4)         | 30 | 31.19 | 0.083          | 0.67         |

\*  $p = 0.008$

Welch's t-tests were conducted for age, IQ, BRIEF and ADI-R comparisons between sexes

IQ = Intelligence Quotient

BRIEF: Behavior Rating Inventory of Executive Functions

ADI-R: Autism Diagnostic Interview-Revised

*Note.* BRIEF scores are reported as T scores (M = 50, SD = 10) and ADI-R scores are reported as domain scores from the diagnostic algorithm.

Supplementary Table S10. Nested hierarchical model summary: Reciprocal social interaction domain and Behavior Regulation Index

| ADI-R A         | R <sup>2</sup> | B      | SE B | 95% CI          | <i>p</i> |
|-----------------|----------------|--------|------|-----------------|----------|
| Model 1         | 0.03           |        |      |                 | 0.486    |
| Constant        |                | 19.98  | 5.20 | [9.65, 30.30]   | < .001*  |
| Sex             |                | -0.13  | 1.32 | [-2.75, 2.49]   | 0.923    |
| IQ              |                | -0.07  | 0.04 | [-0.16, 0.02]   | 0.104    |
| ADHD diagnosis  |                | -1.26  | 1.16 | [-3.56, 1.04]   | 0.279    |
| Age             |                | -0.08  | 0.17 | [-0.42, 0.25]   | 0.618    |
| Model 2         | 0.14           |        |      |                 | 0.015*   |
| Constant        |                | 13.93  | 5.81 | [2.38, 25.47]   | 0.019    |
| Sex             |                | -0.31  | 1.26 | [-2.83, 2.21]   | 0.807    |
| IQ              |                | -0.10  | 0.04 | [-0.18, -0.01]  | 0.369    |
| ADHD diagnosis  |                | -2.23  | 1.15 | [-4.52, 0.06]   | 0.056    |
| Age             |                | -0.09  | 0.17 | [-0.44, 0.27]   | 0.631    |
| BRIEF BRI       |                | 0.13   | 0.04 | [0.04, 0.21]    | 0.003*   |
| Model 3         | 0.21           |        |      |                 | 0.001*   |
| Constant        |                | 34.76  | 9.29 | [16.30, 53.21]  | < .001*  |
| Sex             |                | -17.32 | 6.17 | [-29.58, -5.06] | 0.006*   |
| IQ              |                | -0.08  | 0.04 | [-0.17, 0.00]   | 0.055    |
| ADHD diagnosis  |                | -1.43  | 1.15 | [-3.71, 0.85]   | 0.215    |
| Age             |                | -0.04  | 0.17 | [-0.38, 0.30]   | 0.819    |
| BRIEF BRI       |                | -0.21  | 0.13 | [-0.46, 0.04]   | 0.104    |
| BRIEF BRI * Sex |                | 0.25   | 0.09 | [0.07, 0.43]    | 0.006*   |

*p* = 0.017

ADI-R: Autism Diagnostic Interview- Revised, diagnostic algorithm. A: Reciprocal Social Interaction domain, B: Communication domain, C: Restricted, repetitive and stereotyped behavior domain.

ADHD: Attention deficit/ hyperactivity disorder

IQ: Intelligence Quotient

BRIEF\_BRI: Behavior Rating Inventory of Executive Function, Behavioral Regulation Index

B = unstandardized regression coefficients, CI = confidence interval

Supplementary Table S11. Nested hierarchical model summary: Communication domain and Behavior Regulation Index

| ADI-R B         | R <sup>2</sup> | B      | SE B | 95% CI          | p      |
|-----------------|----------------|--------|------|-----------------|--------|
| Model 1         | 0.01           |        |      |                 | 0.843  |
| Constant        |                | 12.86  | 4.47 | [3.98, 21.74]   | 0.005* |
| Sex             |                | -0.42  | 1.14 | [-2.68, 1.85]   | 0.717  |
| IQ              |                | -0.04  | 0.04 | [-0.11, 0.04]   | 0.357  |
| ADHD diagnosis  |                | 0.44   | 1.01 | [-1.57, 2.45]   | 0.664  |
| Age             |                | 0.01   | 0.15 | [-0.28, 0.30]   | 0.963  |
| Model 2         | 0.09           |        |      |                 | 0.129  |
| Constant        |                | 7.81   | 5.11 | [-2.34, 17.97]  | 0.130  |
| Sex             |                | -0.58  | 1.12 | [-2.81, 1.66]   | 0.609  |
| IQ              |                | -0.04  | 0.04 | [-0.12, 0.04]   | 0.278  |
| ADHD diagnosis  |                | 0.17   | 1.03 | [-1.88, 2.22]   | 0.871  |
| Age             |                | -0.06  | 0.16 | [-0.37, 0.25]   | 0.709  |
| BRIEF BRI       |                | 0.10   | 0.04 | [0.03, 0.17]    | 0.008* |
| Model 3         | 0.19           |        |      |                 | 0.006* |
| Constant        |                | 28.53  | 8.14 | [12.35, 44.70]  | 0.001* |
| Sex             |                | -17.58 | 5.46 | [-28.43, -6.72] | 0.002* |
| IQ              |                | -0.03  | 0.03 | [-0.11, 0.04]   | 0.416  |
| ADHD diagnosis  |                | 0.99   | 1.02 | [-1.03, 3.01]   | 0.332  |
| Age             |                | -0.03  | 0.15 | [-0.33, 0.27]   | 0.850  |
| BRIEF BRI       |                | -0.23  | 0.11 | [-0.45, -0.01]  | 0.040  |
| BRIEF BRI * Sex |                | 0.25   | 0.08 | [0.09, 0.41]    | 0.002* |

p = 0.017

ADI-R: Autism Diagnostic Interview- Revised, diagnostic algorithm. A: Reciprocal Social Interaction domain, B: Communication domain, C: Restricted, repetitive and stereotyped behavior domain.

ADHD: Attention deficit/ hyperactivity disorder

IQ: Intelligence Quotient

BRIEF\_BRI: Behavior Rating Inventory of Executive Function, Behavioral Regulation Index

B = unstandardized regression coefficients, CI = confidence interval

Supplementary Table S12. Nested hierarchical model summary: Restricted, repetitive and stereotyped behavior domain and Behavior Regulation Index

| ADI-R C         | R <sup>2</sup> | B     | SE B | 95% CI          | p      |
|-----------------|----------------|-------|------|-----------------|--------|
| Model 1         | 0.04           |       |      |                 | 0.435  |
| Constant        |                | 5.70  | 2.16 | [1.41, 9.98]    | 0.010* |
| Sex             |                | -1.00 | 0.55 | [-2.09, 0.10]   | 0.073  |
| IQ              |                | -0.01 | 0.02 | [-0.05, 0.02]   | 0.478  |
| ADHD diagnosis  |                | -0.39 | 0.48 | [-1.35, 0.57]   | 0.422  |
| Age             |                | 0.01  | 0.07 | [-0.13, 0.15]   | 0.889  |
| Model 2         | 0.08           |       |      |                 | 0.211  |
| Constant        |                | 3.43  | 2.51 | [-1.55, 8.42]   | 0.175  |
| Sex             |                | -1.07 | 0.55 | [-2.16, -0.03]  | 0.057  |
| IQ              |                | -0.01 | 0.02 | [-0.05, 0.03]   | 0.687  |
| ADHD diagnosis  |                | -0.52 | 0.50 | [-1.52, 0.47]   | 0.301  |
| Age             |                | -0.02 | 0.08 | [-0.17, 0.13]   | 0.804  |
| BRIEF BRI       |                | 0.03  | 0.02 | [-0.00, 0.07]   | 0.072  |
| Model 3         | 0.11           |       |      |                 | 0.109  |
| Constant        |                | 9.46  | 4.14 | [1.23, 17.70]   | 0.025  |
| Sex             |                | -6.01 | 2.78 | [-11.54, -0.49] | 0.033  |
| IQ              |                | -0.00 | 0.02 | [-0.04, 0.03]   | 0.822  |
| ADHD diagnosis  |                | -0.29 | 0.51 | [-1.30, 0.73]   | 0.575  |
| Age             |                | -0.01 | 0.08 | [-0.16, 0.14]   | 0.893  |
| BRIEF BRI       |                | -0.06 | 0.06 | [-0.17, 0.05]   | 0.263  |
| BRIEF BRI * Sex |                | 0.07  | 0.04 | [-0.01, 0.15]   | 0.073  |

\*  $p = 0.017$

ADI-R: Autism Diagnostic Interview- Revised, diagnostic algorithm. A: Reciprocal Social Interaction domain, B: Communication domain, C: Restricted, repetitive and stereotyped behavior domain.

ADHD: Attention deficit/ hyperactivity disorder

IQ: Intelligence Quotient

BRIEF\_BRI: Behavior Rating Inventory of Executive Function, Behavioral Regulation Index

B = unstandardized regression coefficients, CI = confidence interval

Supplementary Table S13. Nested hierarchical model summary: Reciprocal social interaction domain and Metacognition Index

| ADI-R A        | R <sup>2</sup> | B      | SE B  | 95% CI           | p       |
|----------------|----------------|--------|-------|------------------|---------|
| Model 1        | 0.03           |        |       |                  | 0.486   |
| Constant       |                | 19.98  | 5.20  | [9.65, 30.30]    | < .001* |
| Sex            |                | -0.13  | 1.32  | [-2.75, 2.49]    | 0.923   |
| IQ             |                | -0.07  | 0.04  | [-0.16, 0.02]    | 0.104   |
| ADHD diagnosis |                | -1.26  | 1.16  | [-3.56, 1.04]    | 0.279   |
| Age            |                | -0.08  | 0.17  | [-0.42, 0.25]    | 0.618   |
| Model 2        | 0.09           |        |       |                  | 0.111   |
| Constant       |                | 12.32  | 6.03  | [0.35, 24.28]    | 0.044   |
| Sex            |                | -0.70  | 1.31  | [-3.30, 1.90]    | 0.594   |
| IQ             |                | -0.07  | 0.04  | [-0.15, 0.02]    | 0.121   |
| ADHD diagnosis |                | -1.87  | 1.16  | [-4.18, 0.43]    | 0.110   |
| Age            |                | -0.07  | 0.17  | [-0.40, 0.26]    | 0.680   |
| BRIEF MI       |                | 0.12   | 0.05  | [0.02, 0.22]     | 0.020   |
| Model 3        | 0.18           |        |       |                  | 0.004*  |
| Constant       |                | 47.07  | 12.00 | [23.24, 70.90]   | < .001* |
| Sex            |                | -30.98 | 9.27  | [-49.38, -12.58] | 0.001*  |
| IQ             |                | -0.07  | 0.04  | [-0.15, 0.01]    | 0.097   |
| ADHD diagnosis |                | -1.40  | 1.11  | [-3.62, 0.81]    | 0.211   |
| Age            |                | -0.07  | 0.16  | [-0.38, 0.24]    | 0.656   |
| BRIEF MI       |                | -0.40  | 0.16  | [-0.72, -0.07]   | 0.018   |
| BRIEF MI * Sex |                | 0.45   | 0.14  | [0.18, 0.72]     | 0.001*  |

p = 0.017

ADI-R: Autism Diagnostic Interview- Revised, diagnostic algorithm. A: Reciprocal Social Interaction domain, B: Communication domain, C: Restricted, repetitive and stereotyped behavior domain.

ADHD: Attention deficit/ hyperactivity disorder

IQ: Intelligence Quotient

BRIEF\_MI: Behavior Rating Inventory of Executive Function, Metacognition Index

B = unstandardized regression coefficients, CI = confidence interval

Supplementary Table S14. Nested hierarchical model summary: Communication domain and Metacognition Index

| ADI-R B        | R <sup>2</sup> | B      | SE B  | 95% CI          | p      |
|----------------|----------------|--------|-------|-----------------|--------|
| Model 1        | 0.01           |        |       |                 | 0.843  |
| Constant       |                | 12.86  | 4.47  | [3.98, 21.74]   | 0.005* |
| Sex            |                | -0.42  | 1.14  | [-2.68, 1.85]   | 0.717  |
| IQ             |                | -0.04  | 0.04  | [-0.11, 0.04]   | 0.357  |
| ADHD diagnosis |                | 0.44   | 1.01  | [-1.57, 2.45]   | 0.664  |
| Age            |                | 0.01   | 0.15  | [-0.28, 0.30]   | 0.963  |
| Model 2        | 0.06           |        |       |                 | 0.328  |
| Constant       |                | 7.01   | 5.20  | [-3.31, 17.34]  | 0.181  |
| Sex            |                | -0.87  | 1.14  | [-3.14, 1.40]   | 0.447  |
| IQ             |                | -0.03  | 0.04  | [-0.11, 0.04]   | 0.408  |
| ADHD diagnosis |                | -0.05  | 1.02  | [-2.08, 1.97]   | 0.990  |
| Age            |                | 0.02   | 0.14  | [-0.27, 0.30]   | 0.907  |
| BRIEF MI       |                | 0.09   | 0.04  | [0.01, 0.18]    | 0.038  |
| Model 3        | 0.13           |        |       |                 | 0.047  |
| Constant       |                | 31.95  | 10.62 | [10.85, 53.06]  | 0.003* |
| Sex            |                | -22.59 | 8.22  | [-38.92, -6.26] | 0.007* |
| IQ             |                | -0.03  | 0.04  | [-0.10, 0.04]   | 0.383  |
| ADHD diagnosis |                | 0.32   | 1.00  | [-1.66, 2.30]   | 0.750  |
| Age            |                | 0.01   | 0.14  | [-0.27, 0.28]   | 0.966  |
| BRIEF MI       |                | -0.28  | 0.14  | [-0.56, 0.01]   | 0.059  |
| BRIEF MI * Sex |                | 0.32   | 0.12  | [0.08, 0.56]    | 0.009* |

p = 0.017

ADI-R: Autism Diagnostic Interview- Revised, diagnostic algorithm. A: Reciprocal Social Interaction domain, B: Communication domain, C: Restricted, repetitive and stereotyped behavior domain.  
 ADHD: Attention deficit/ hyperactivity disorder  
 IQ: Intelligence Quotient  
 BRIEF\_MI: Behavior Rating Inventory of Executive Function, Metacognition Index  
 B = unstandardized regression coefficients, CI = confidence interval

Supplementary Table S15. Nested hierarchical model summary: Restricted, repetitive and stereotyped behavior domain and Metacognition Index

| ADI-R C        | R <sup>2</sup> | B     | SE B | 95% CI         | p      |
|----------------|----------------|-------|------|----------------|--------|
| Model 1        | 0.04           |       |      |                | 0.435  |
| Constant       |                | 5.70  | 2.16 | [1.41, 9.98]   | 0.010* |
| Sex            |                | -1.00 | 0.55 | [-2.09, 0.10]  | 0.073  |
| IQ             |                | -0.01 | 0.02 | [-0.05, 0.02]  | 0.478  |
| ADHD diagnosis |                | -0.39 | 0.48 | [-1.35, 0.57]  | 0.422  |
| Age            |                | 0.01  | 0.07 | [-0.13, 0.15]  | 0.889  |
| Model 2        | 0.08           |       |      |                | 0.153  |
| Constant       |                | 2.91  | 2.51 | [-2.28, 7.65]  | 0.249  |
| Sex            |                | -1.22 | 0.55 | [-2.23, -0.07] | 0.030  |
| IQ             |                | -0.01 | 0.02 | [-0.05, 0.02]  | 0.540  |
| ADHD diagnosis |                | -0.62 | 0.49 | [-1.54, 0.37]  | 0.210  |
| Age            |                | 0.01  | 0.07 | [-0.13, 0.15]  | 0.832  |
| BRIEF MI       |                | 0.04  | 0.02 | [0.01, 0.09]   | 0.040  |
| Model 3        | 0.10           |       |      |                | 0.128  |
| Constant       |                | 9.28  | 5.27 | [-1.18, 19.74] | 0.081  |
| Sex            |                | -6.77 | 4.08 | [-14.87, 1.33] | 0.100  |
| IQ             |                | -0.01 | 0.02 | [-0.05, 0.02]  | 0.533  |
| ADHD diagnosis |                | -0.52 | 0.49 | [-1.50, 0.45]  | 0.287  |
| Age            |                | 0.01  | 0.07 | [-1.13, 0.15]  | 0.862  |
| BRIEF MI       |                | -0.05 | 0.07 | [-0.19, 0.09]  | 0.486  |
| BRIEF MI * Sex |                | 0.08  | 0.06 | [-0.04, 0.20]  | 0.173  |

\*  $p = 0.017$

ADI-R: Autism Diagnostic Interview- Revised, diagnostic algorithm. A: Reciprocal Social Interaction domain, B: Communication domain, C: Restricted, repetitive and stereotyped behavior domain.

ADHD: Attention deficit/ hyperactivity disorder

IQ: Intelligence Quotient

BRIEF\_MI: Behavior Rating Inventory of Executive Function, Metacognition Index

B = unstandardized regression coefficients, CI = confidence interval
